# Supplementary material
Source: PubMed Central journal article supplement (PMC10018445)

# Sequencing depth of coverage for Sample 1

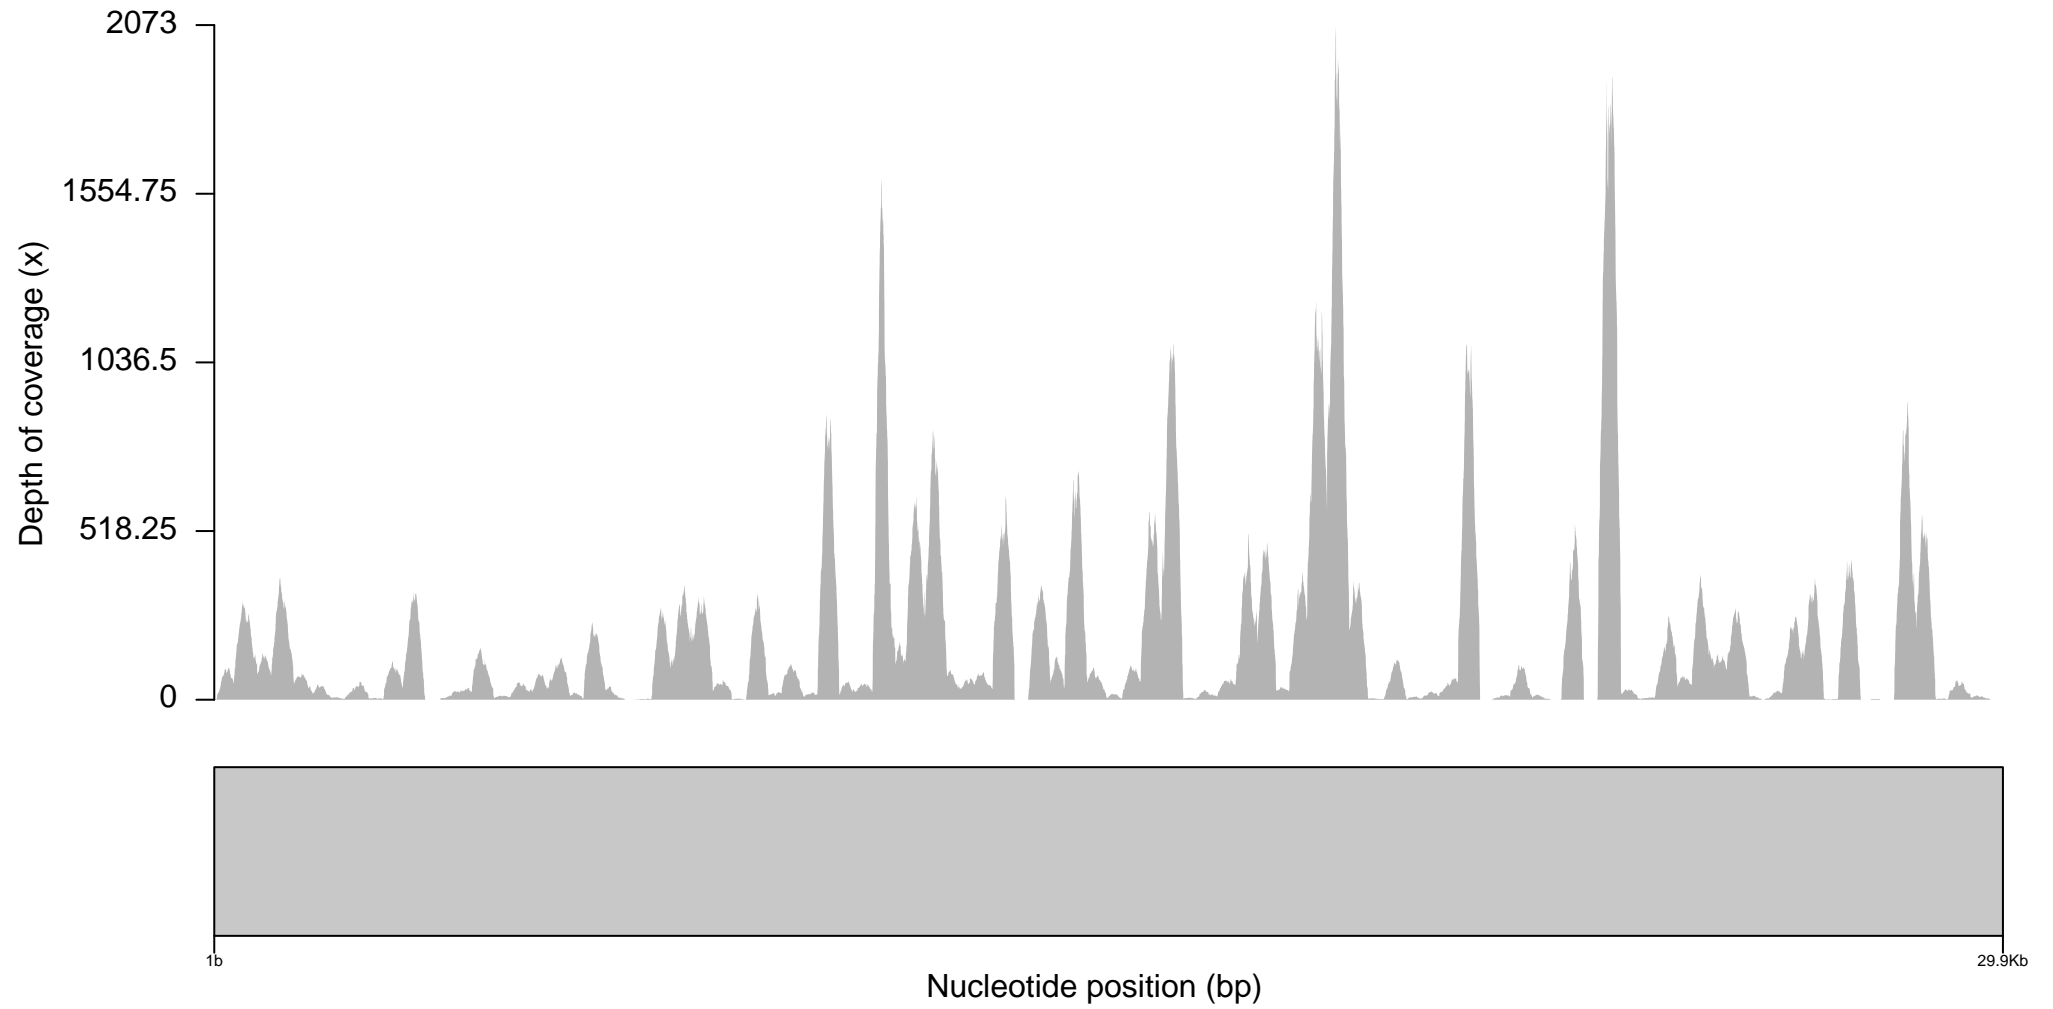

# Sequencing depth of coverage for Sample 2

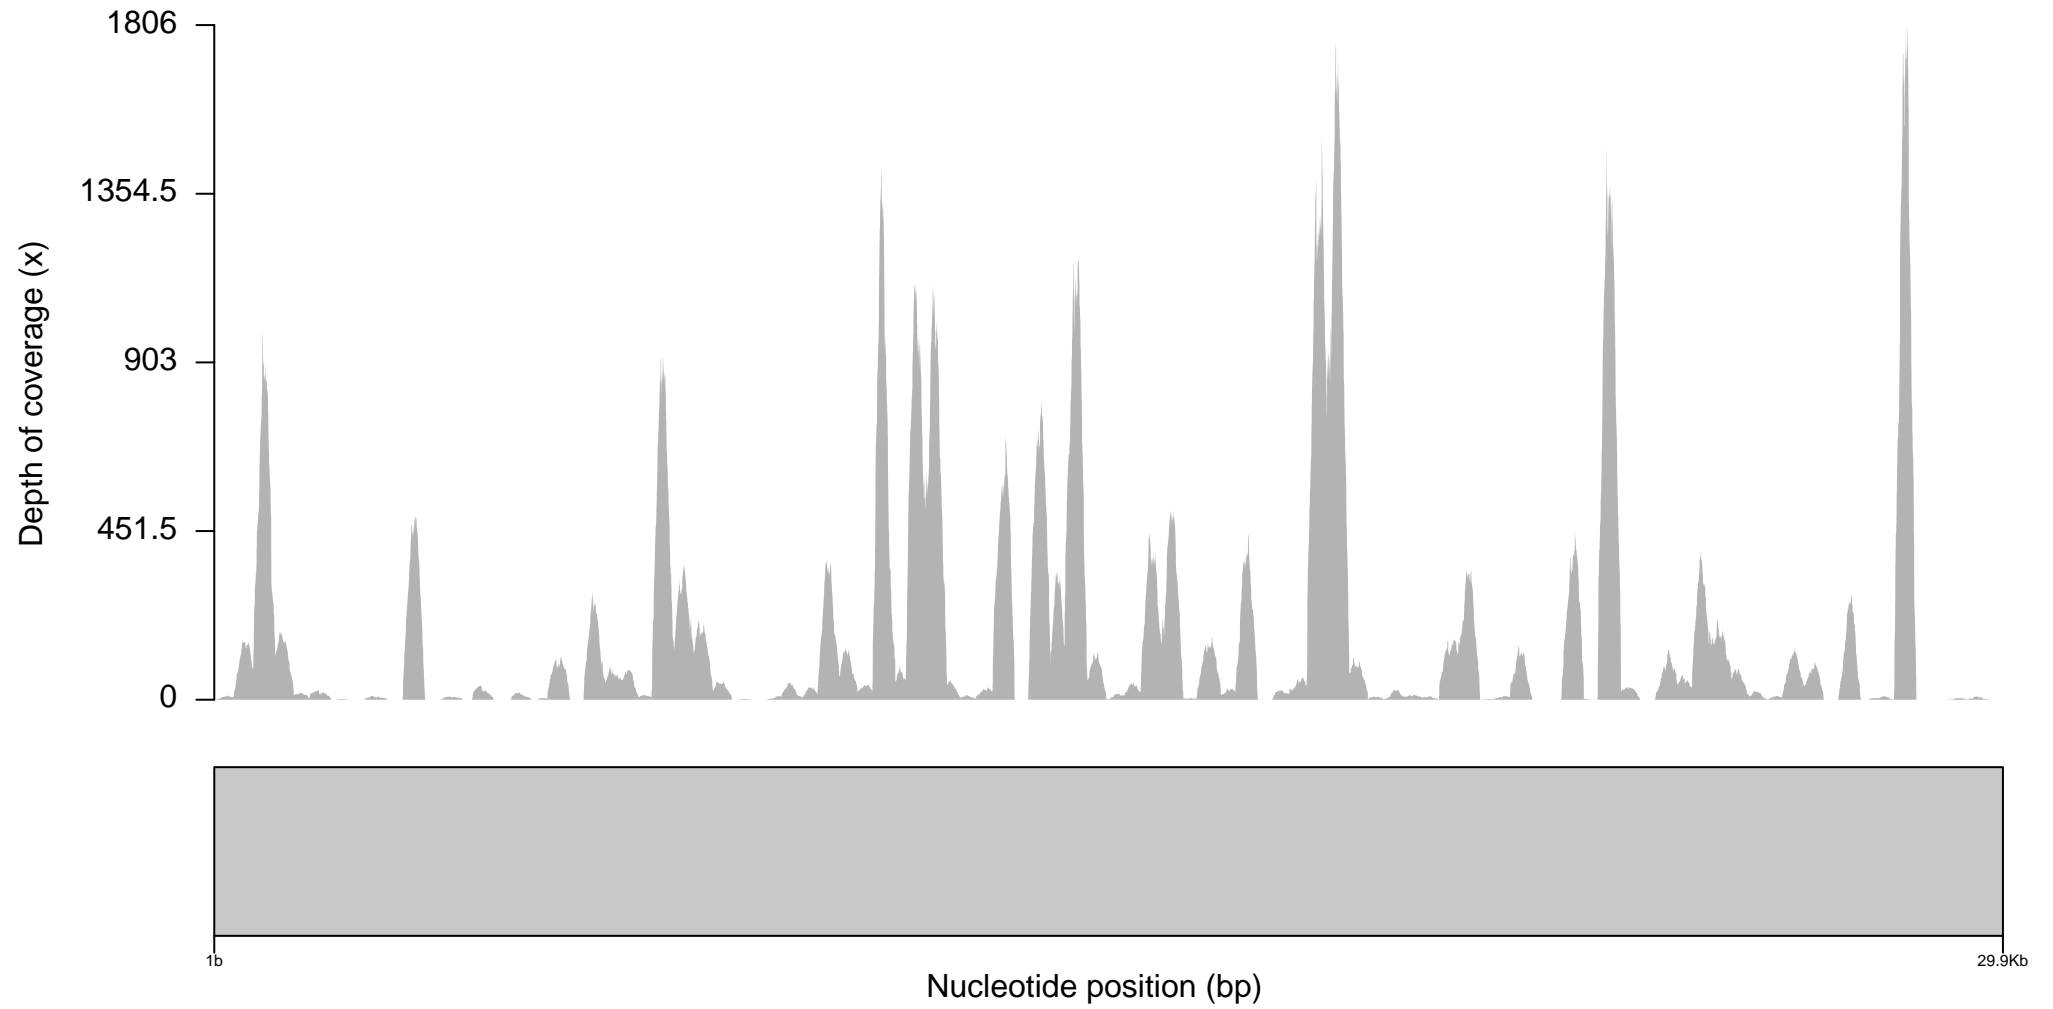

# Sequencing depth of coverage for Sample 3

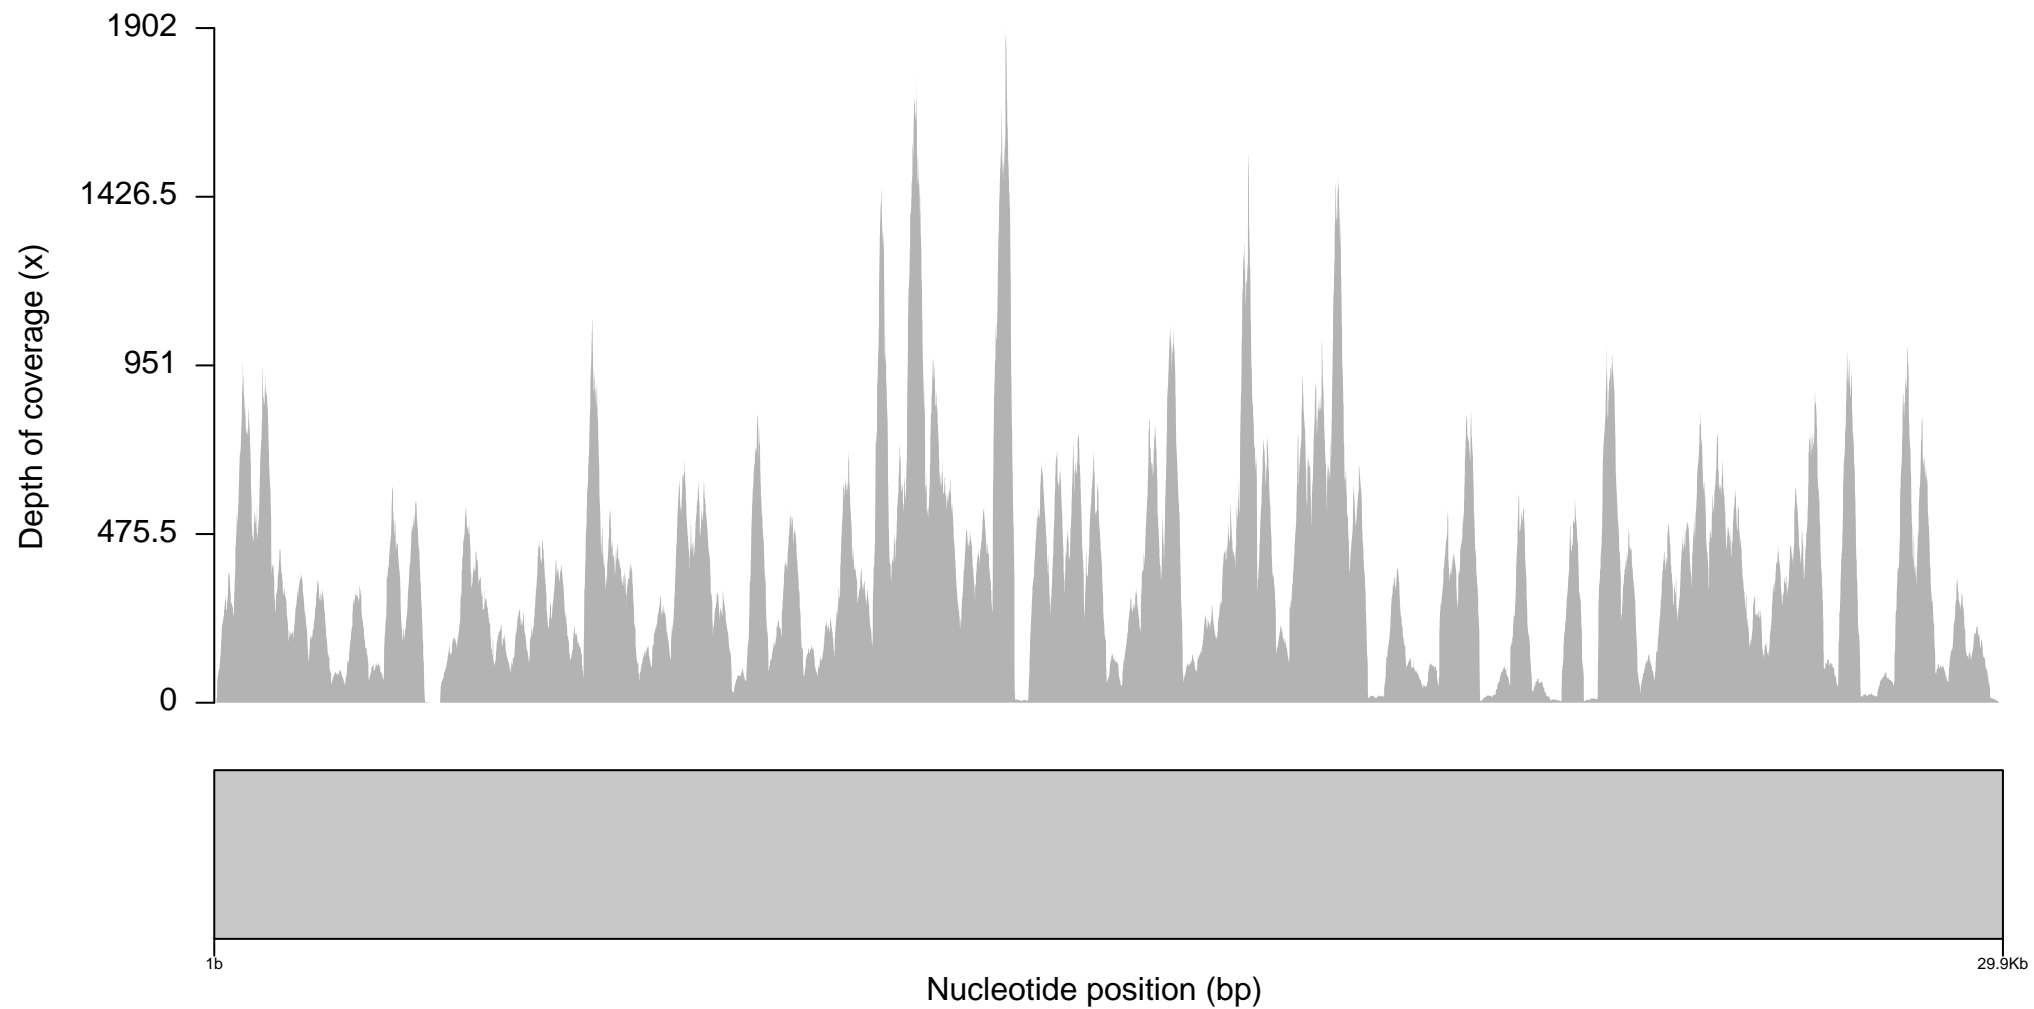

# Sequencing depth of coverage for Sample 4

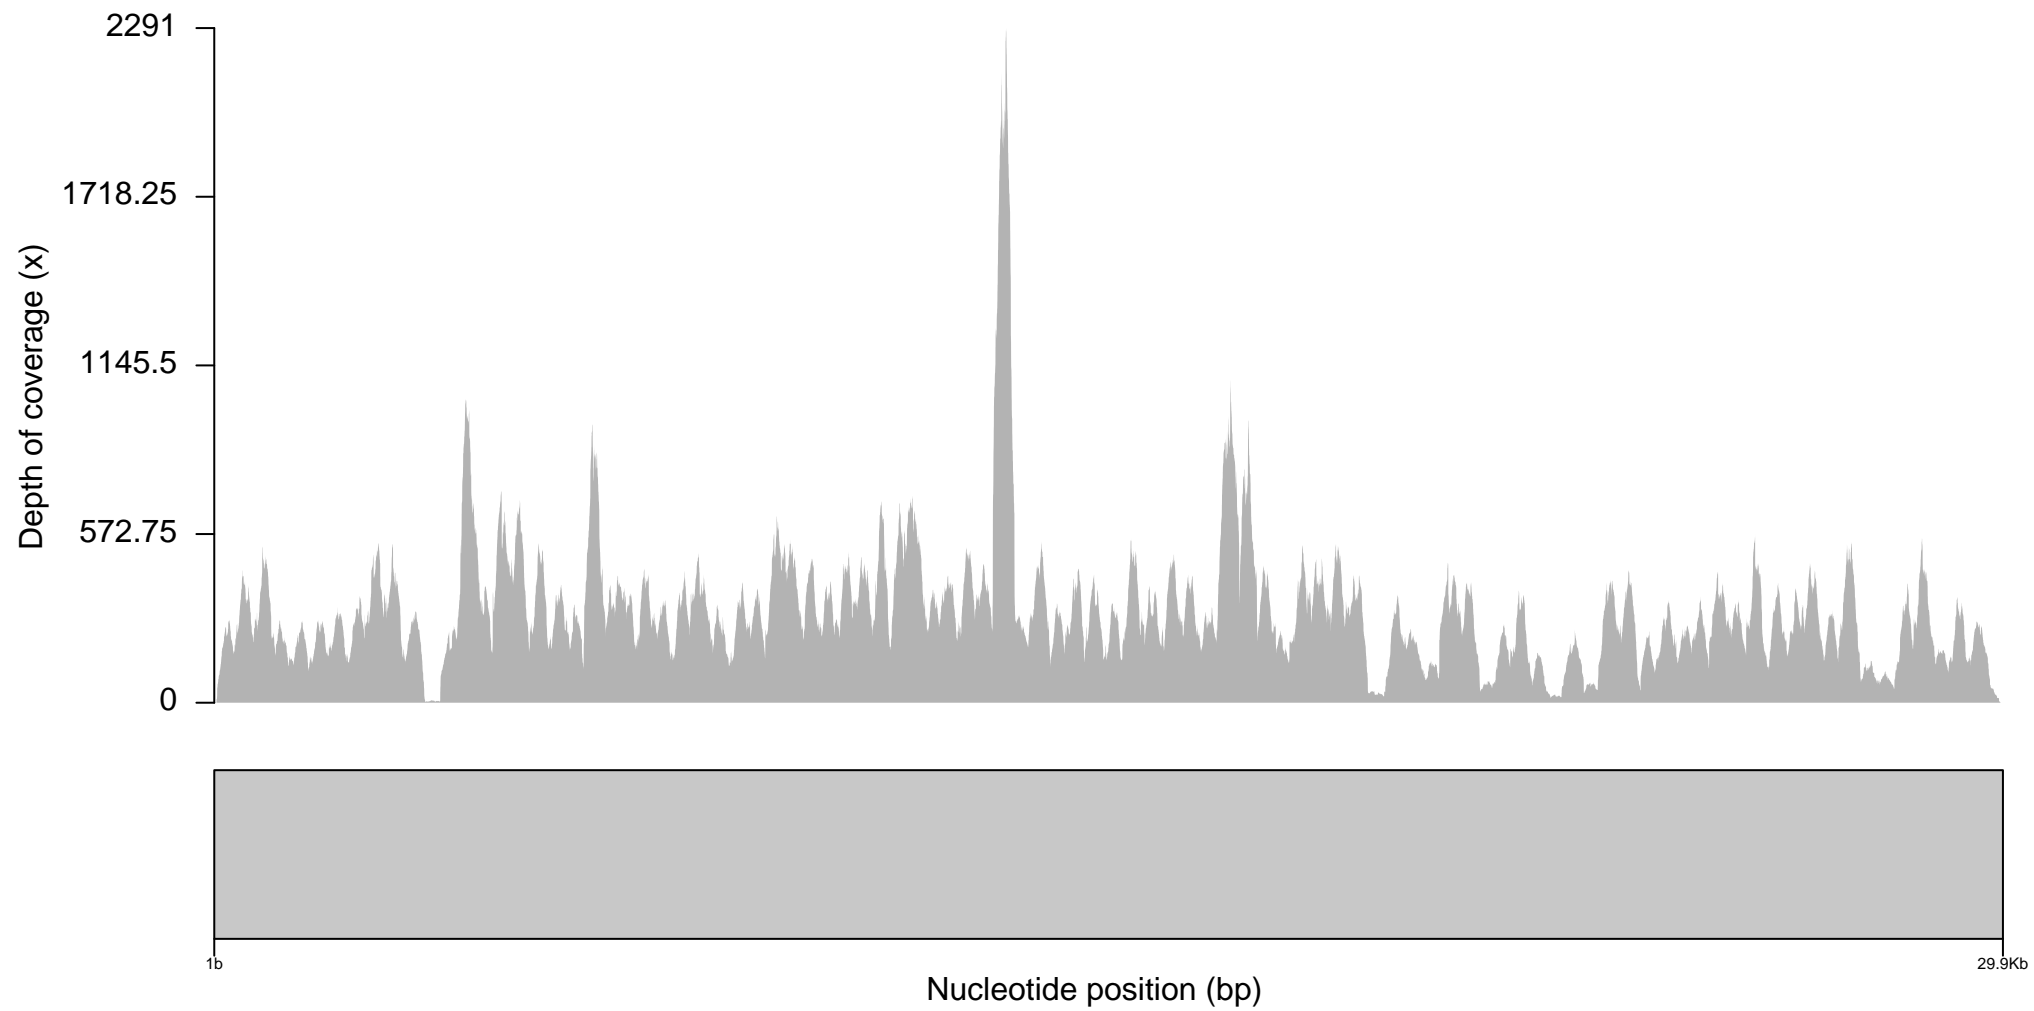

# Sequencing depth of coverage for Sample 5

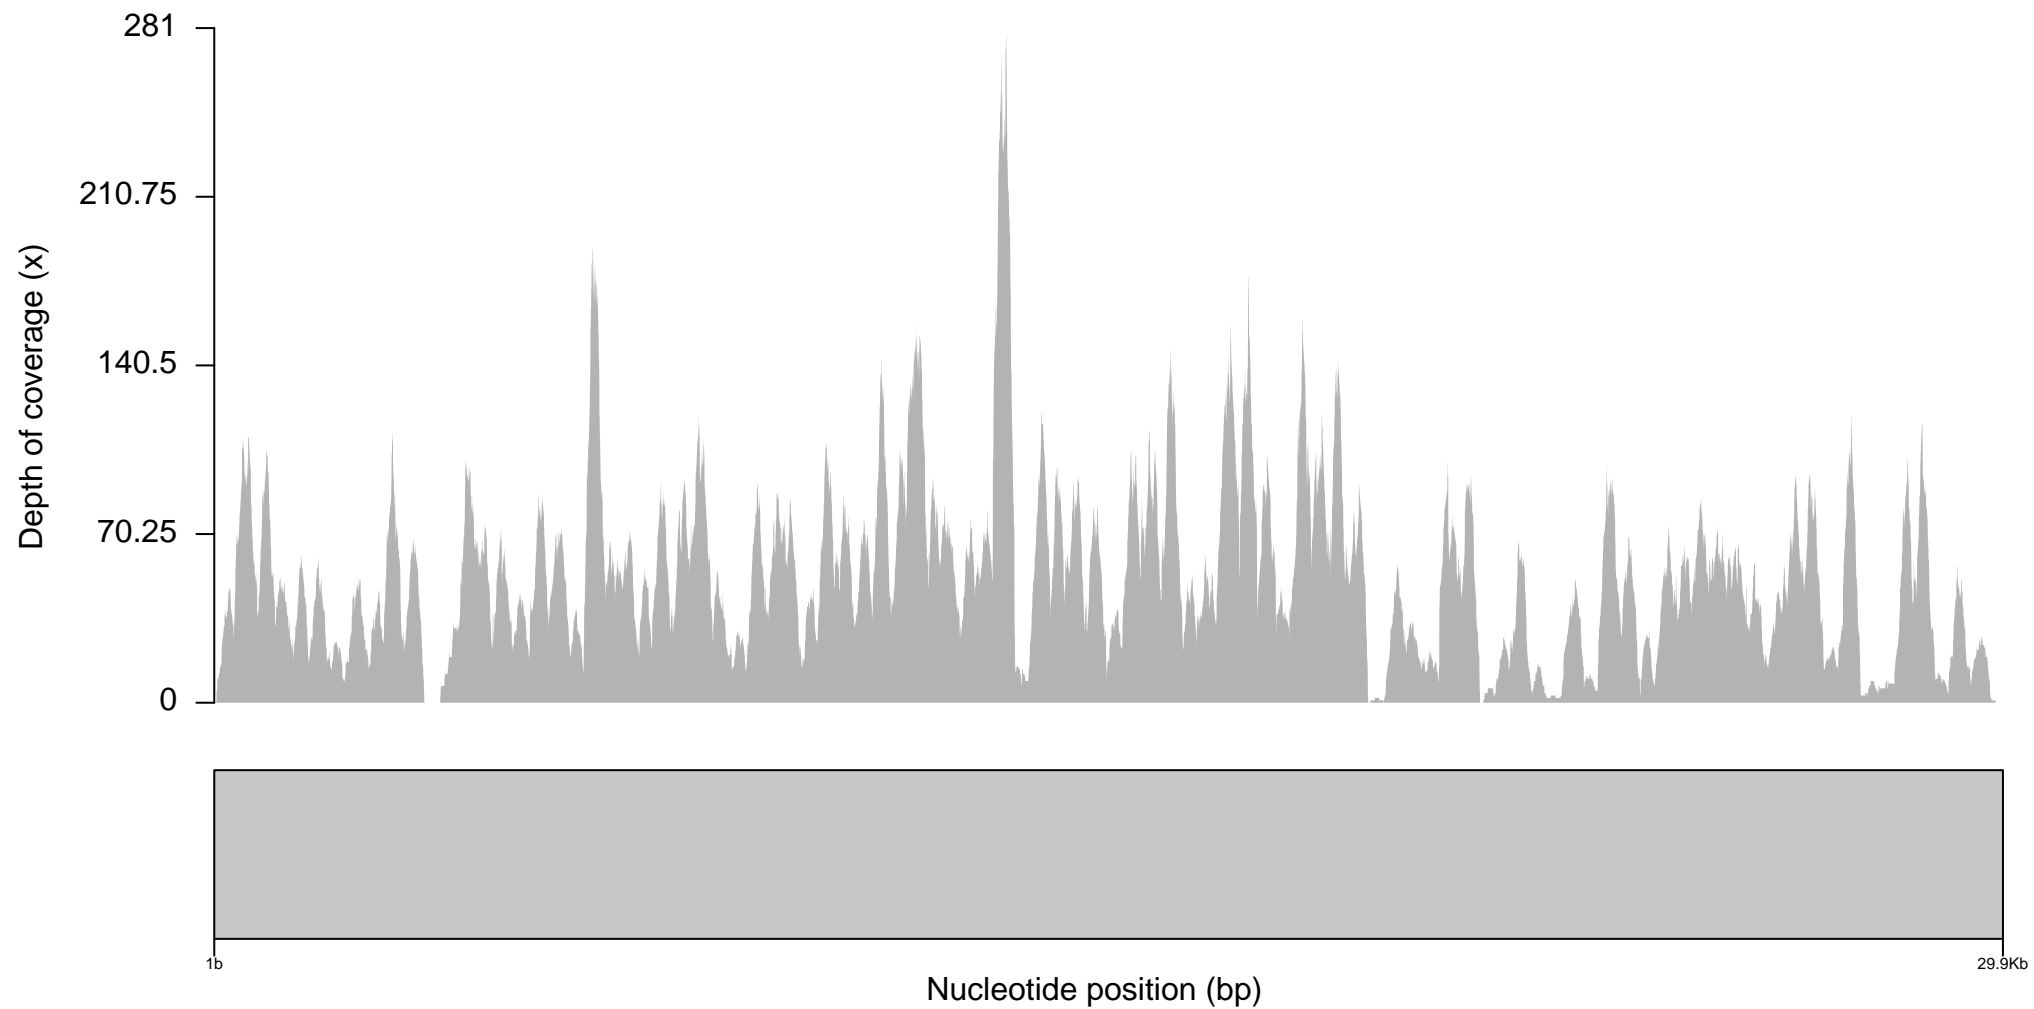

# Sequencing depth of coverage for Sample 6

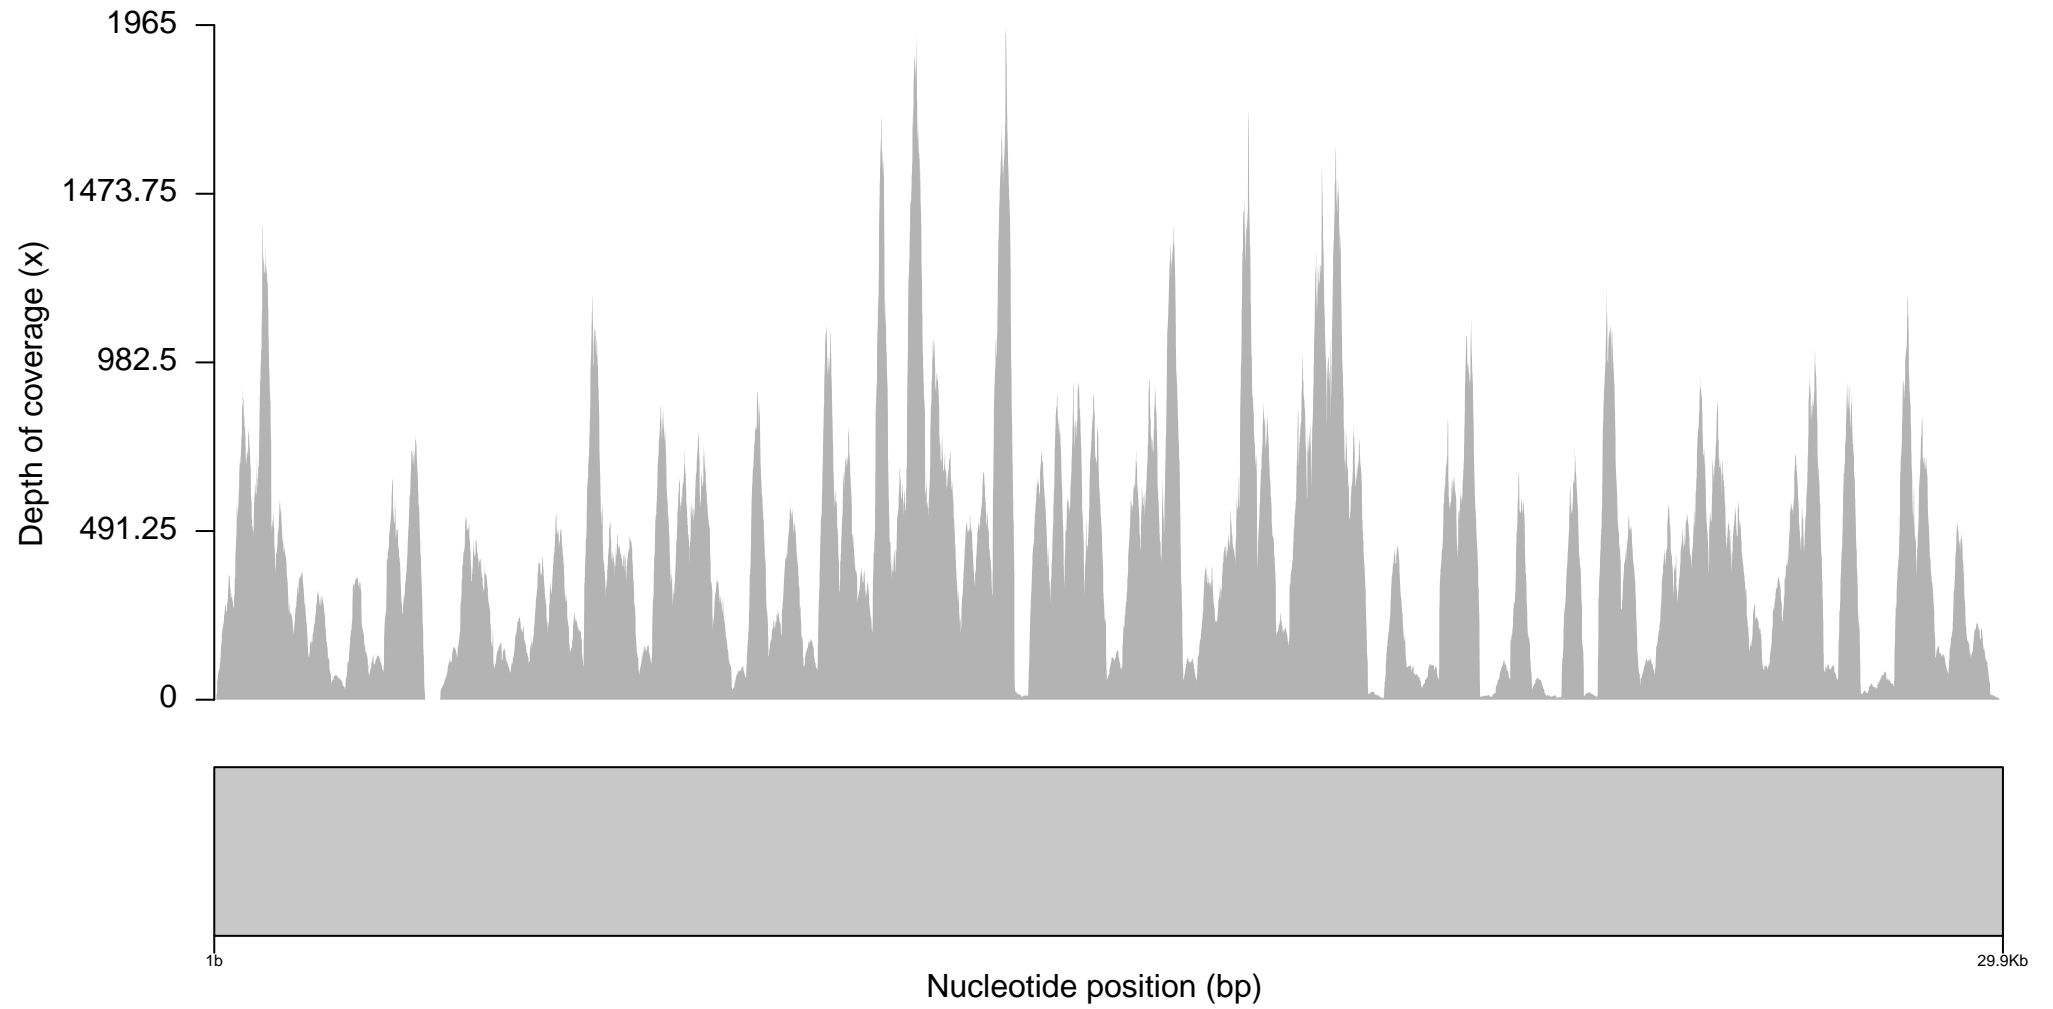

# Sequencing depth of coverage for Sample 7

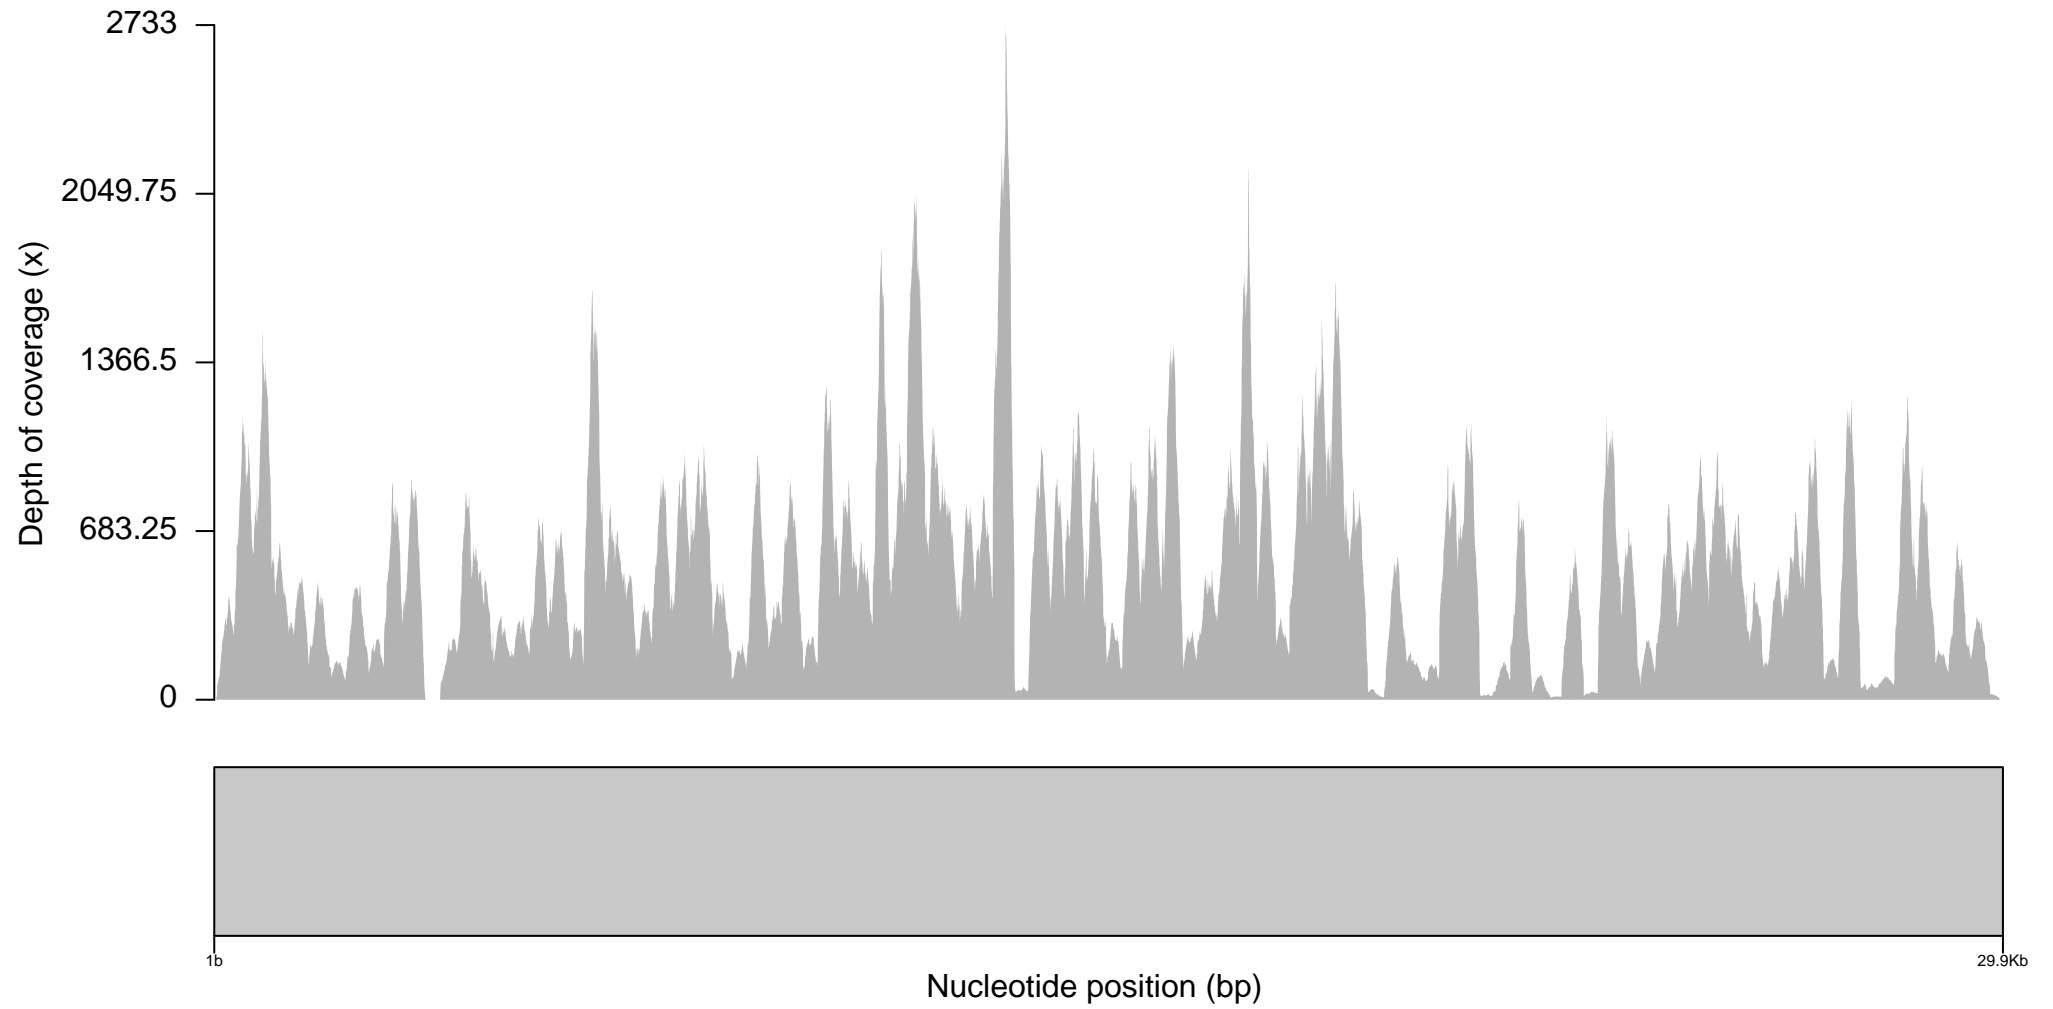

# Sequencing depth of coverage for Sample 8

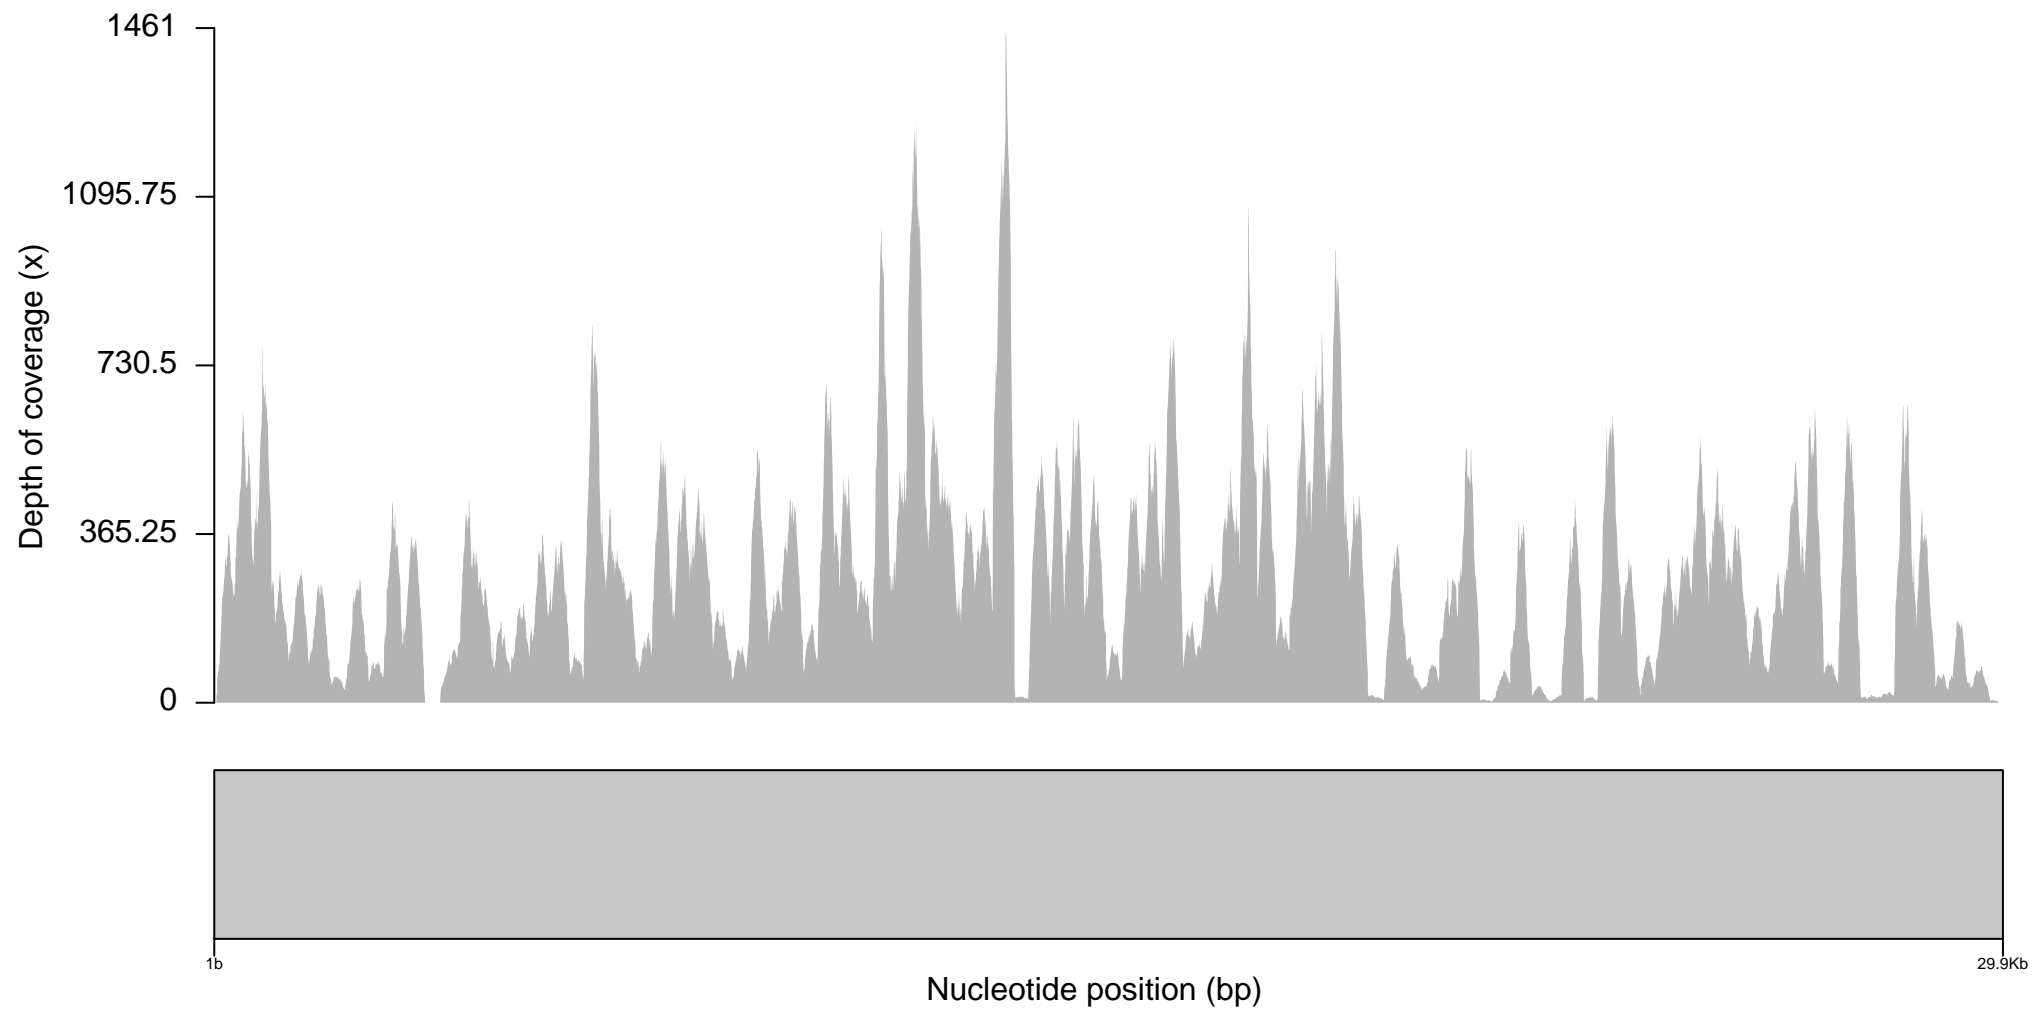



# Sequencing depth of coverage for Sample 9

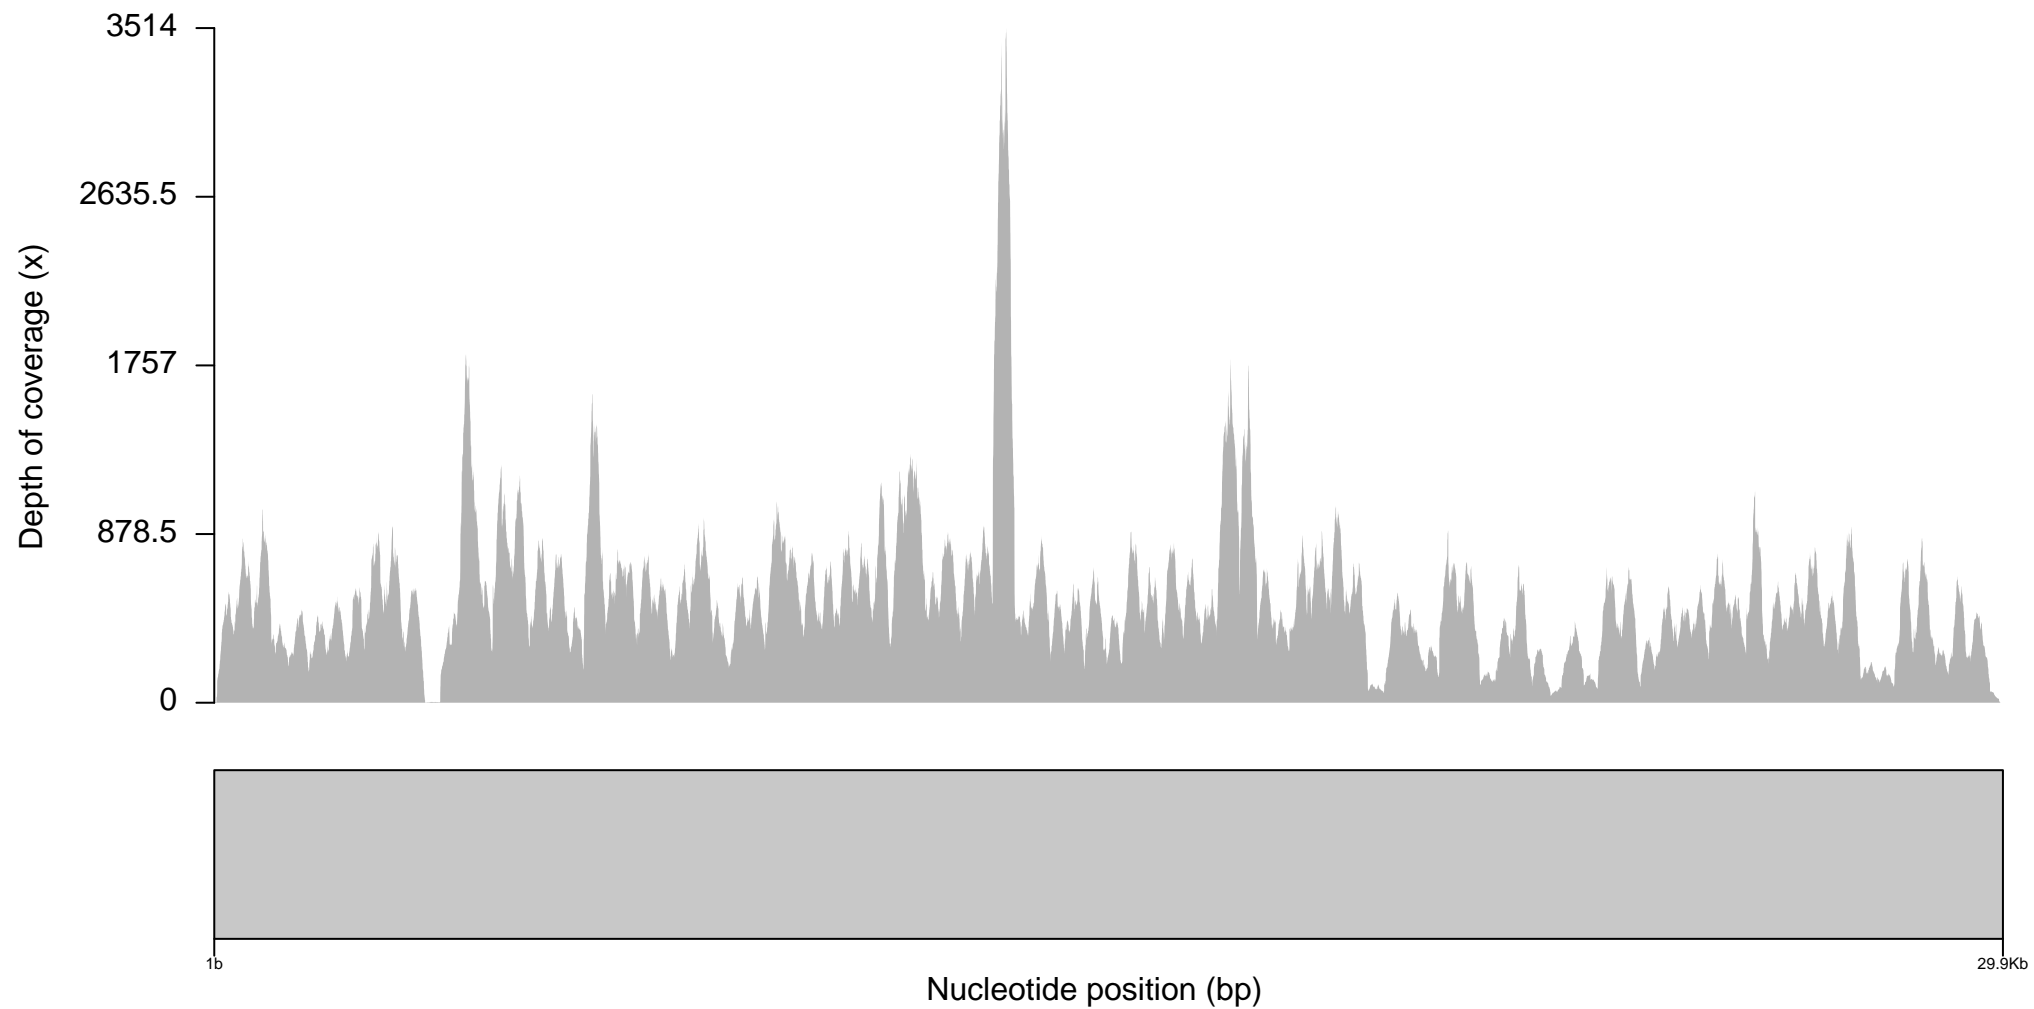

# Sequencing depth of coverage for Sample 10

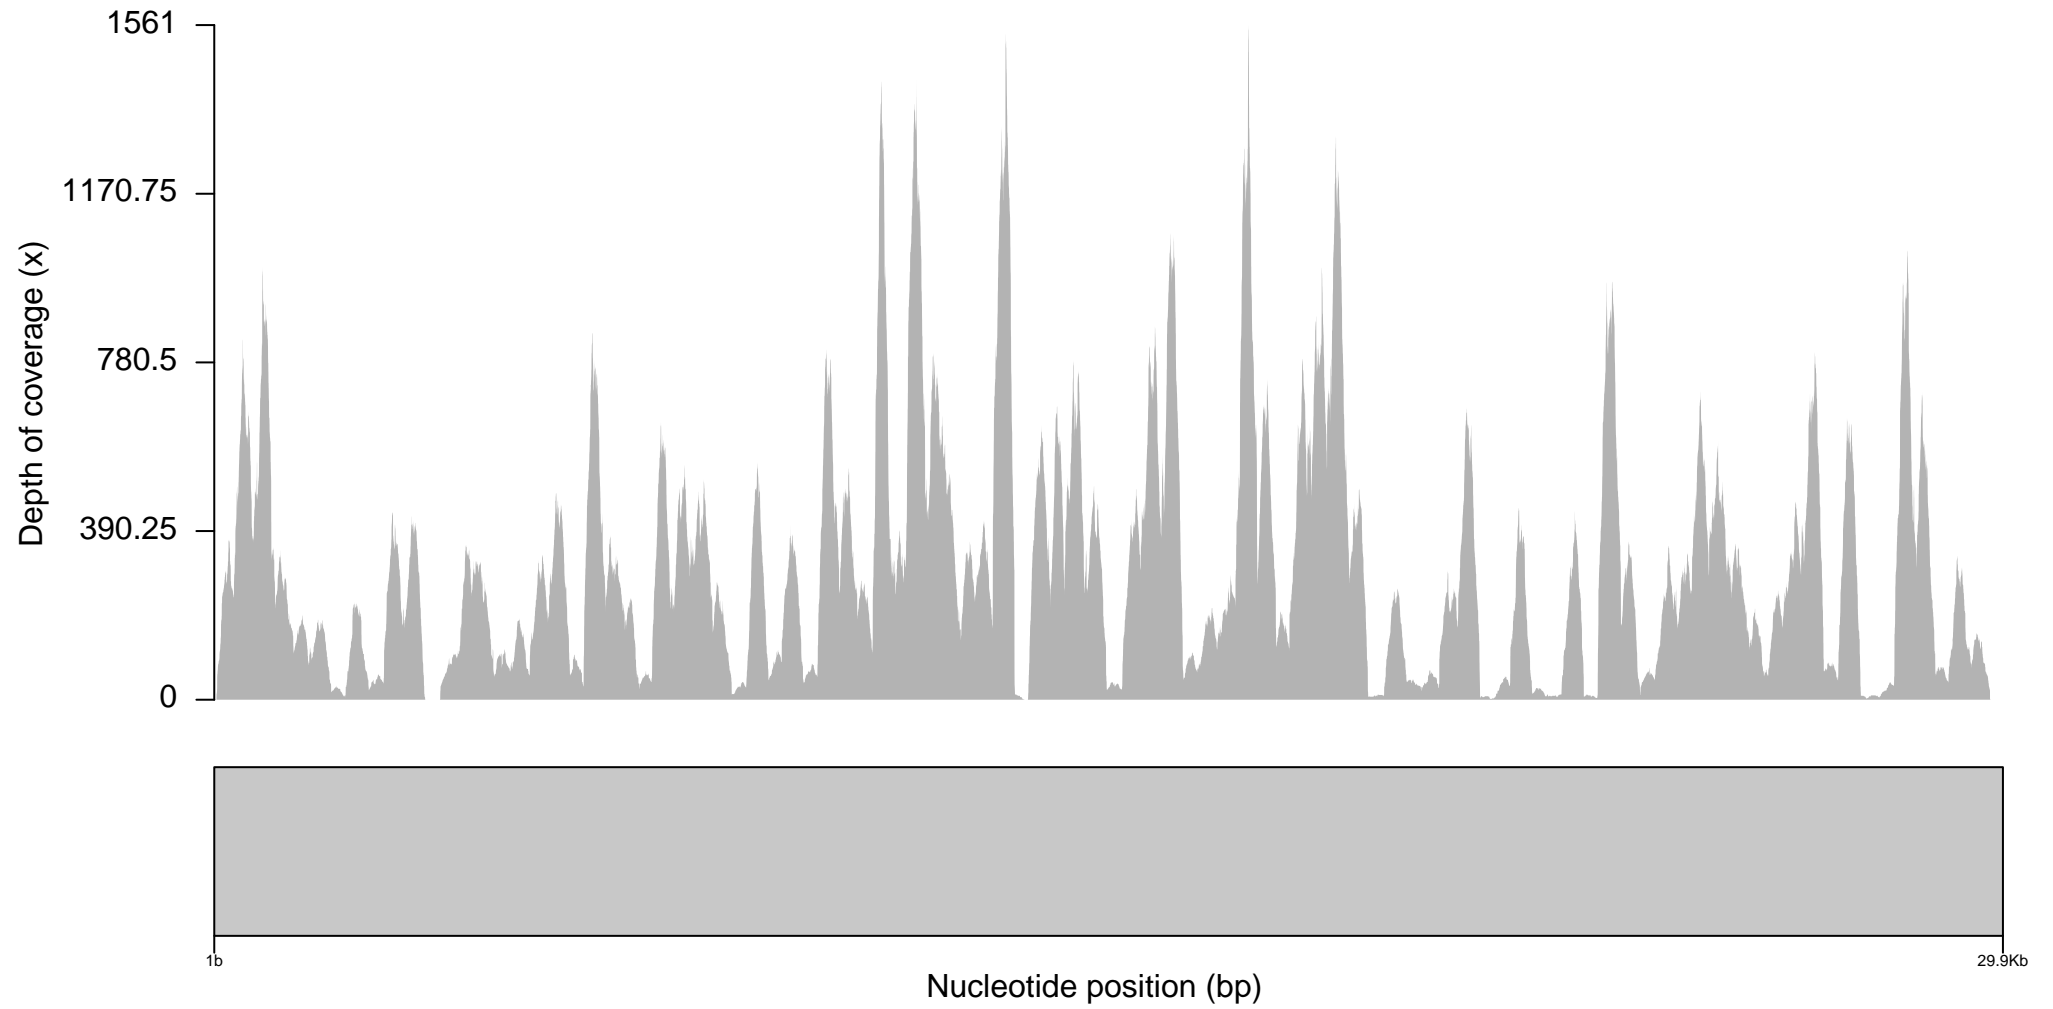

# Sequencing depth of coverage for Sample 11

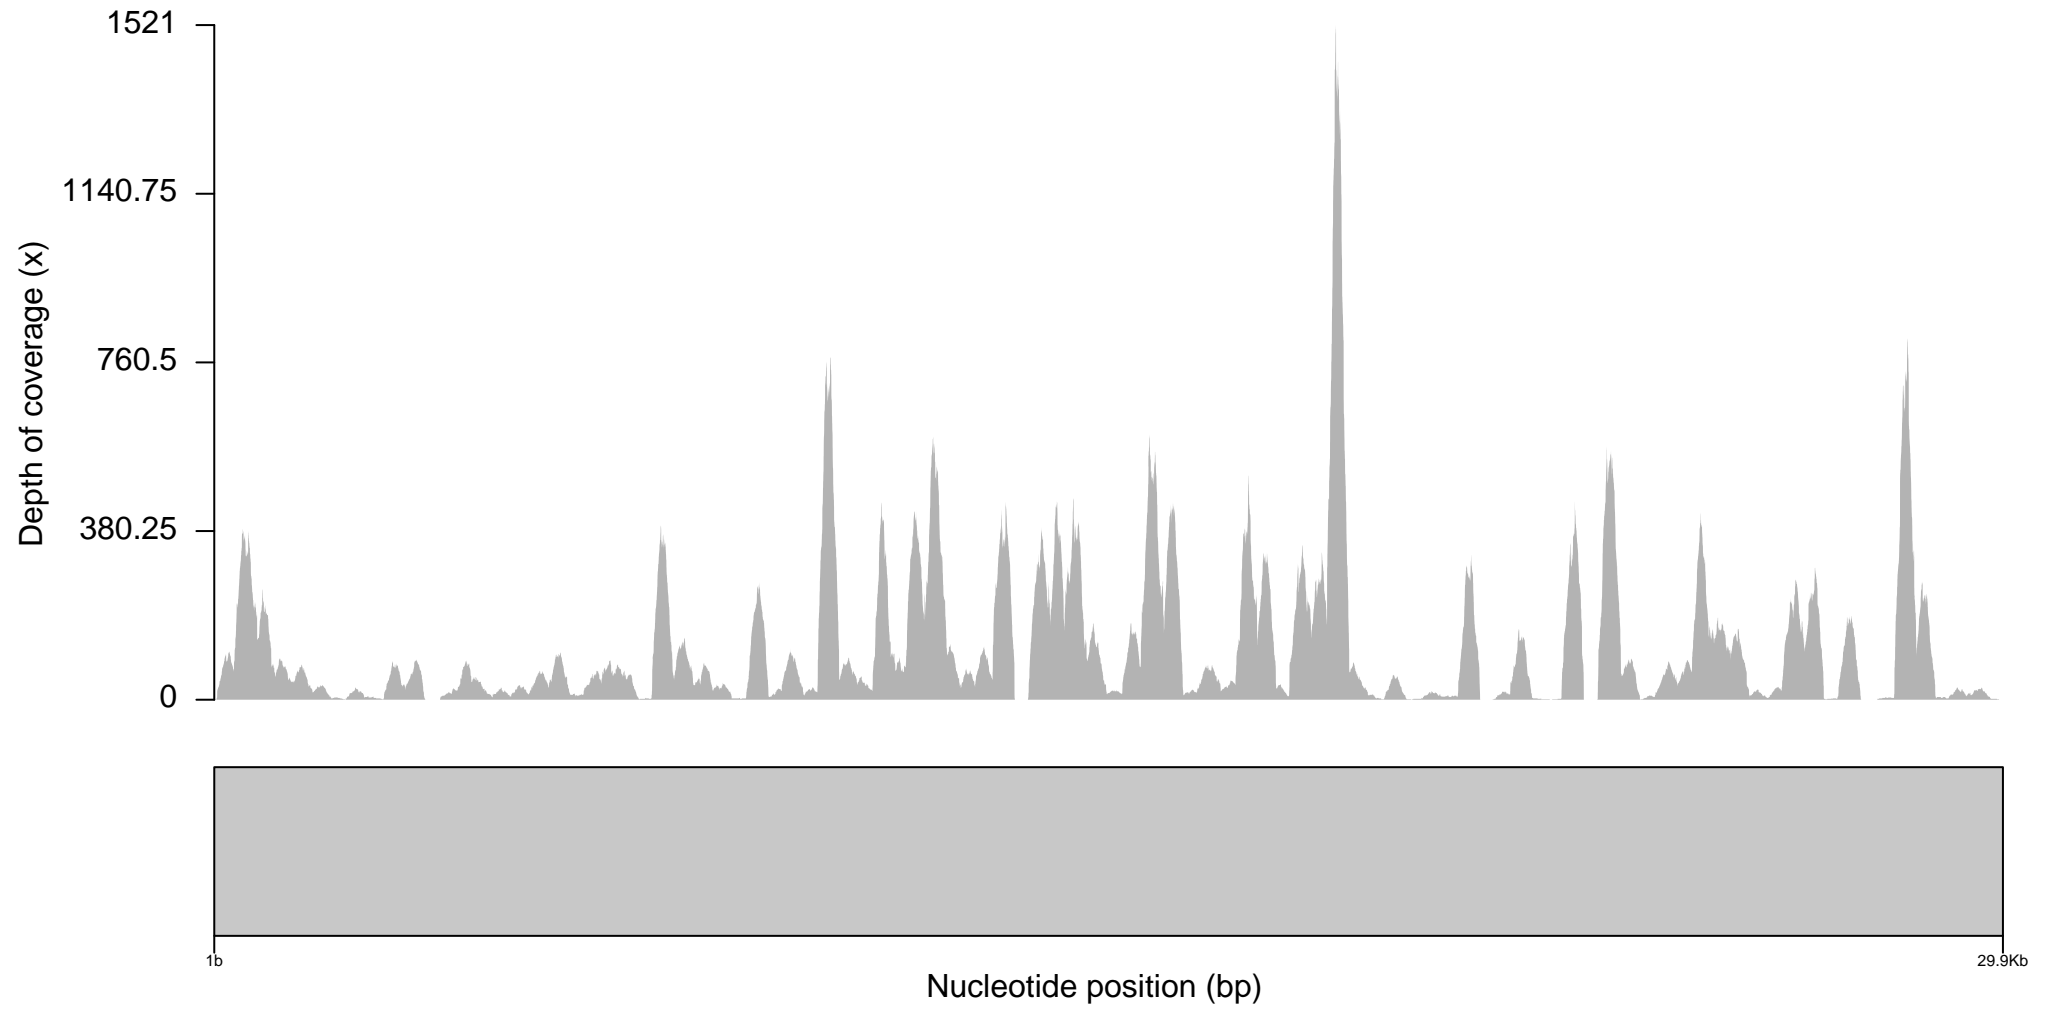

Sequencing depth of coverage for Sample 12

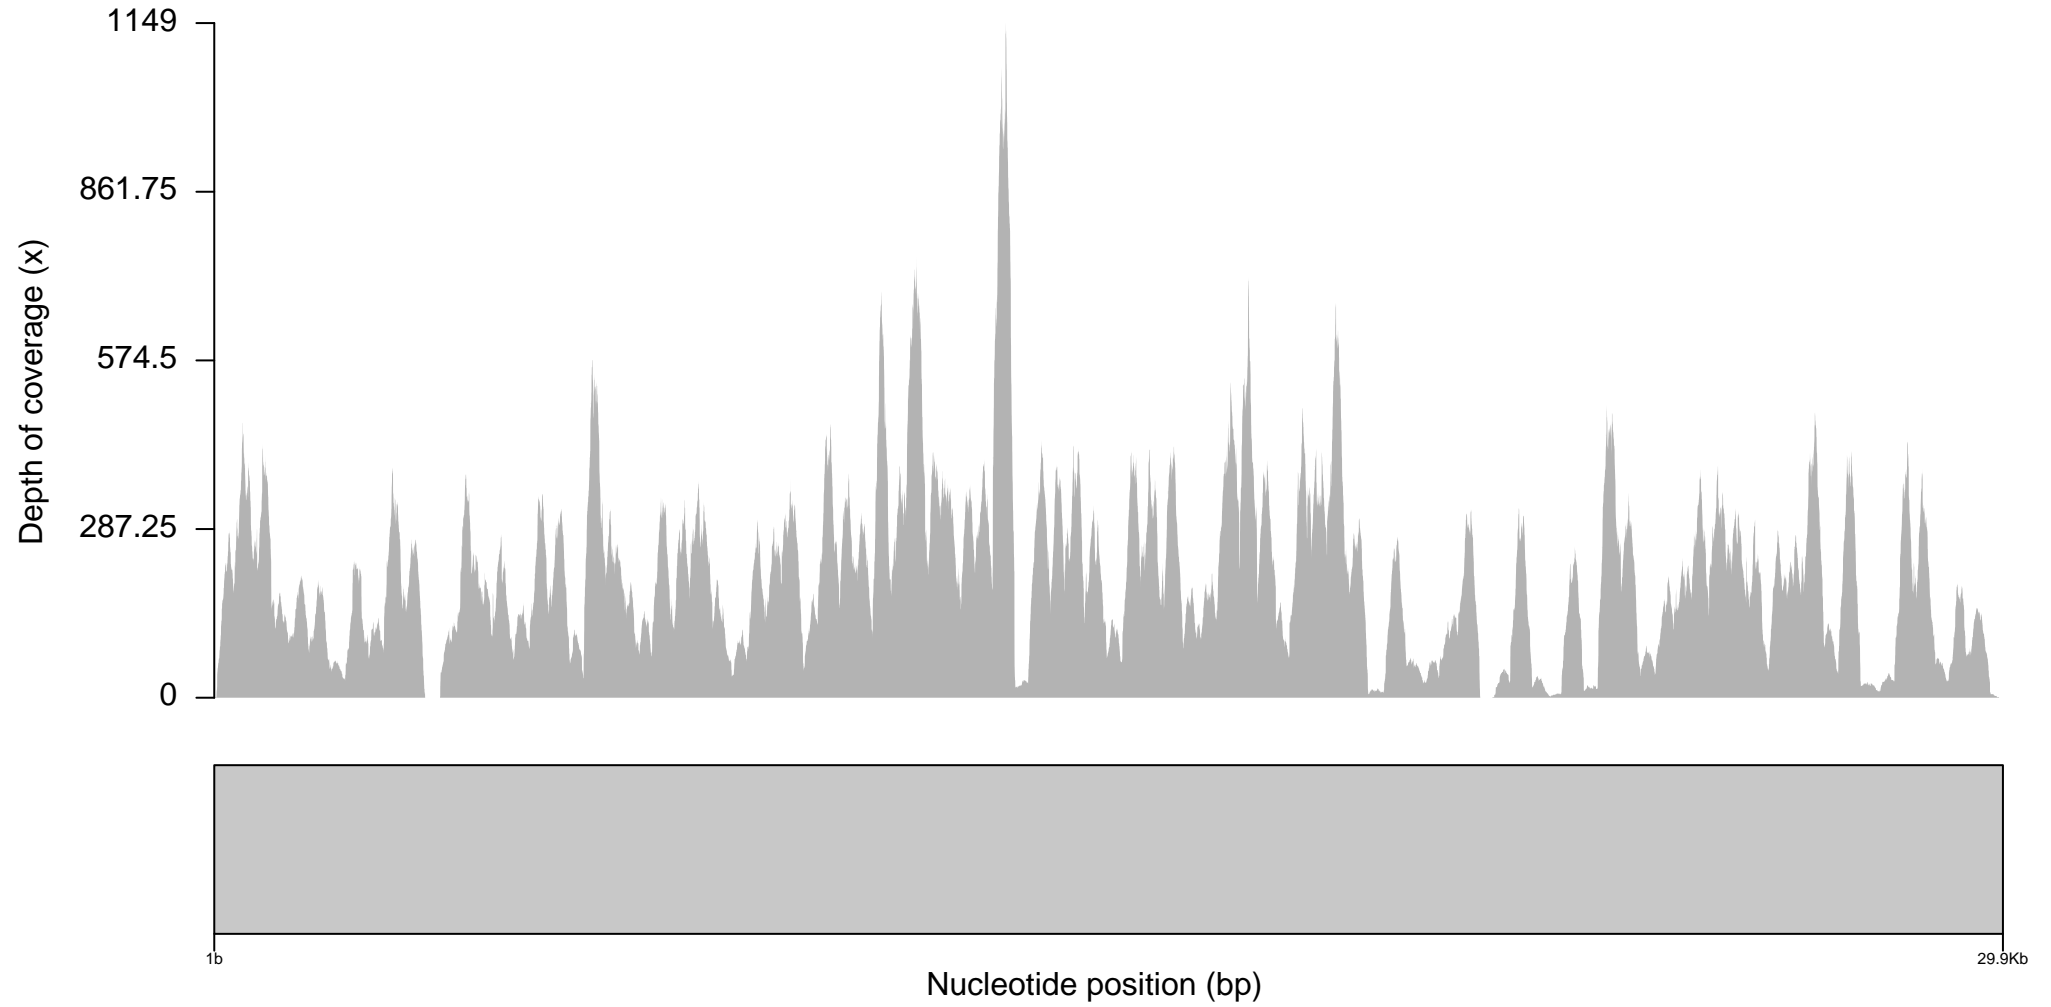

Supplement: mmc1.pdf [file mmc1.pdf]
