# Supplementary material
Source: PubMed Central journal article supplement (PMC10018445)
Supplement: mmc3.pdf [file mmc3.pdf]

## SUPPLEMENTAL TABLE

### **Data Availability**

GISAID Identifier: EPI\_SET\_221213dt

doi: [10.55876/gis8.221213dt](https://doi.org/10.55876/gis8.221213dt)

All genome sequences and associated metadata in this dataset are published in GISAID's EpiCoV database. To view the contributors of each individual sequence with details such as accession number, Virus name, Collection date, Originating Lab and Submitting Lab and the list of Authors, visit [10.55876/gis8.221213dt](https://gisaid.org/221213dt)

### **Data Snapshot**

- EPI\_SET\_221213dt is composed of 4,706 individual genome sequences.
- The collection dates range from 2020-03-01 to 2022-05-31;
- Data were collected in 1 countries and territories;
- All sequences in this dataset are compared relative to hCoV-19/Wuhan/WIV04/2019 (WIV04), the official reference sequence employed by GISAID (EPI\_ISL\_402124). Learn more at <https://gisaid.org/WIV04>.
